# Supplementary material for: Trafficking and persistence of alloantigen-specific chimeric antigen receptor regulatory T cells in Cynomolgus macaque
Source: PubMed Central journal article supplement (PMC9133392; doi:10.1016/j.xcrm.2022.100614), 2022-05-11
Supplement: mmc1.pdf [file mmc1.pdf]

**Cell Reports Medicine, Volume 3**

**Supplemental information**

**Trafficking and persistence  
of alloantigen-specific chimeric antigen receptor  
regulatory T cells in *Cynomolgus macaque***

**Gavin I. Ellis, Kimberly E. Coker, Delaine W. Winn, Mosha Z. Deng, Divanshu Shukla, Vijay Bhoj, Michael C. Milone, Wei Wang, Chengyang Liu, Ali Naji, Raimon Duran-Struuck, and James L. Riley**

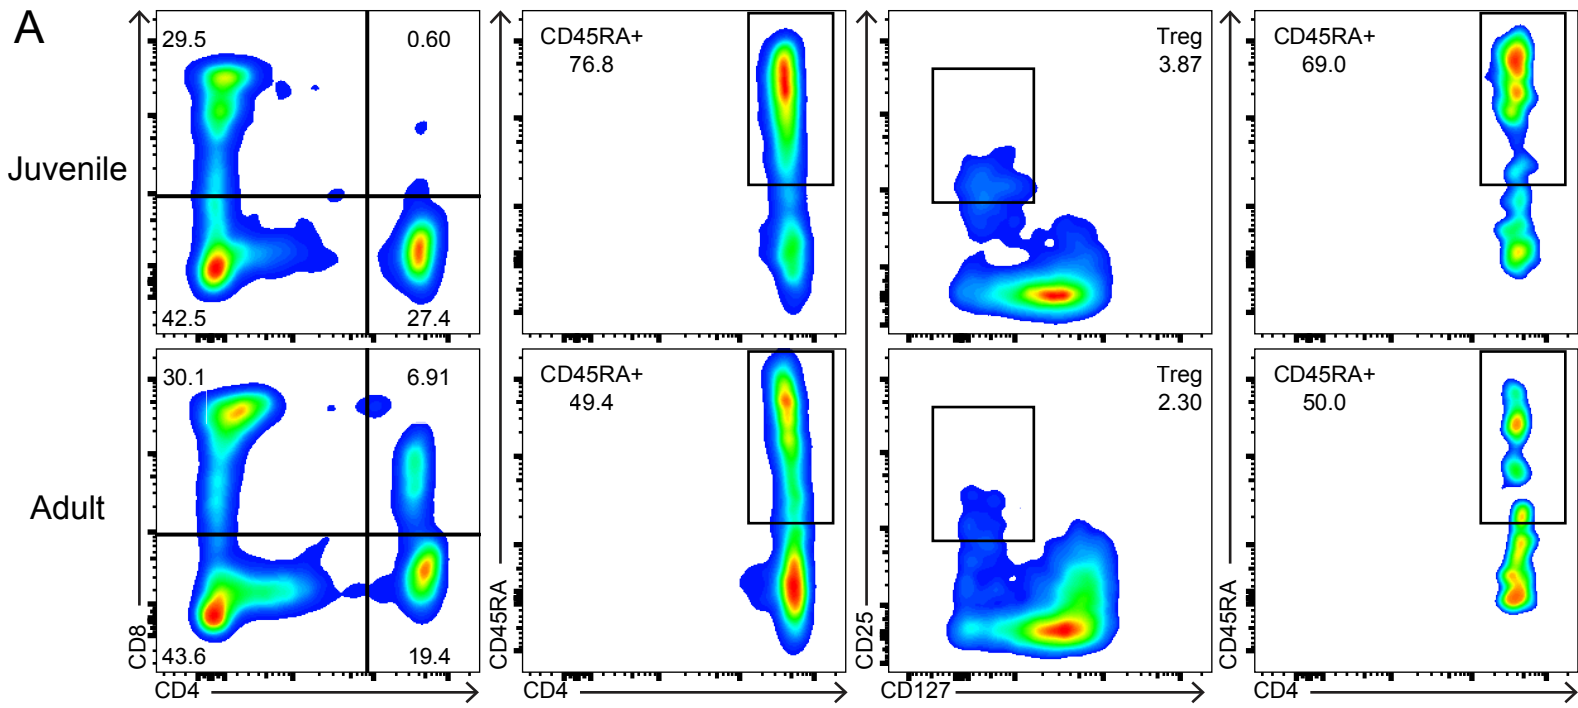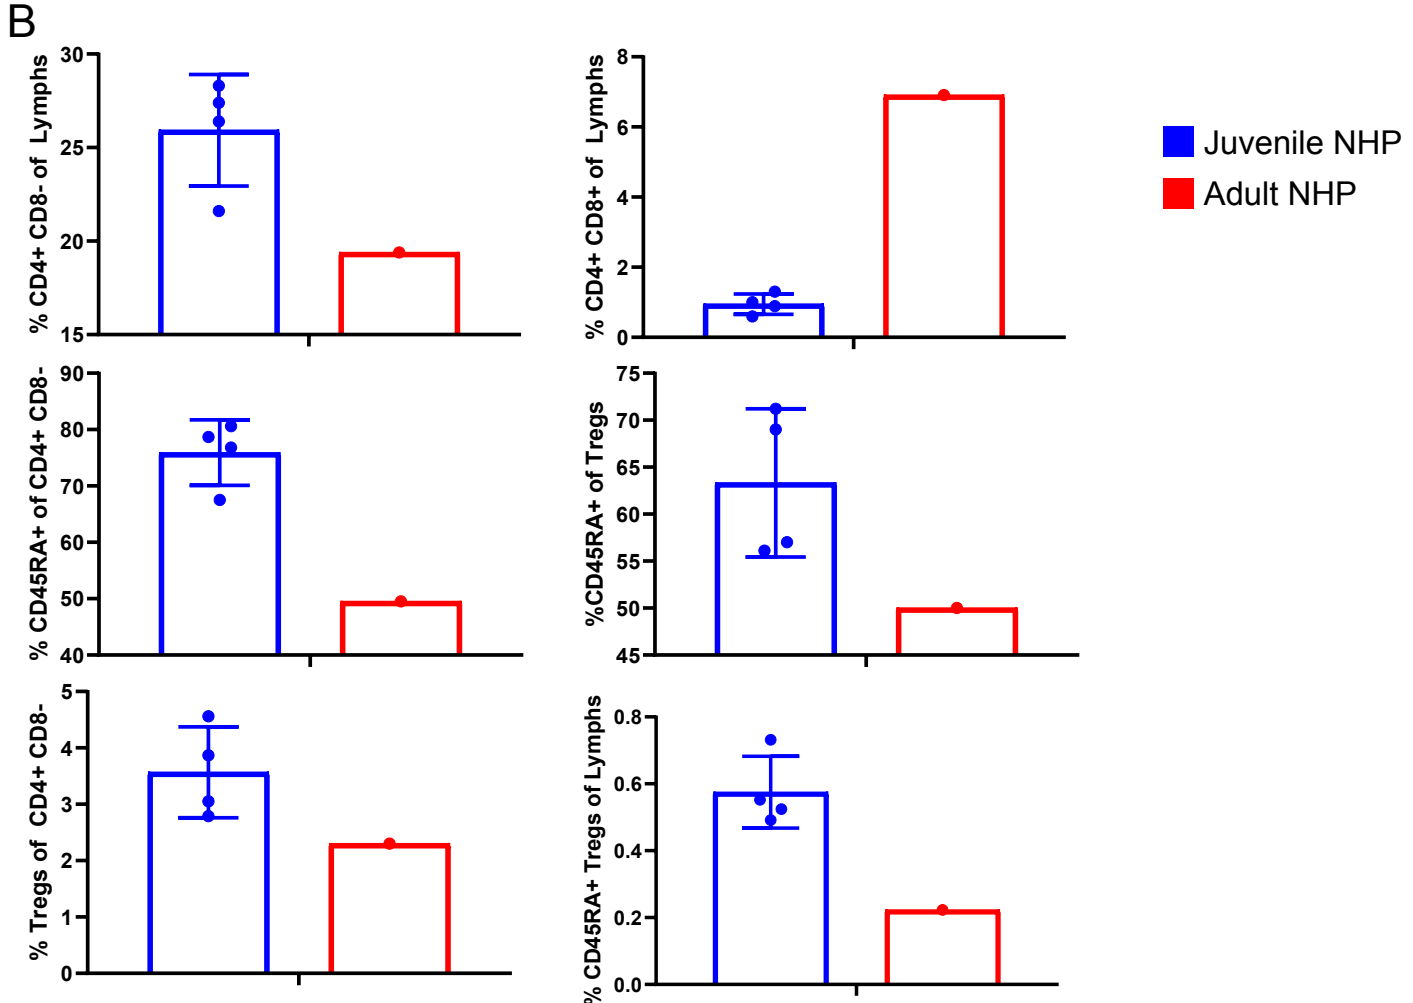

**Figure S1. Peripheral blood of juvenile NHPs contains more CD45RA<sup>+</sup> Tregs than adult blood, Related to Figure 2.** (A) Flow cytometry phenotype of peripheral blood from juvenile (top) or adult (bottom) NHPs. (B) Summary of peripheral blood flow phenotypes across 5 animals stratified by age.

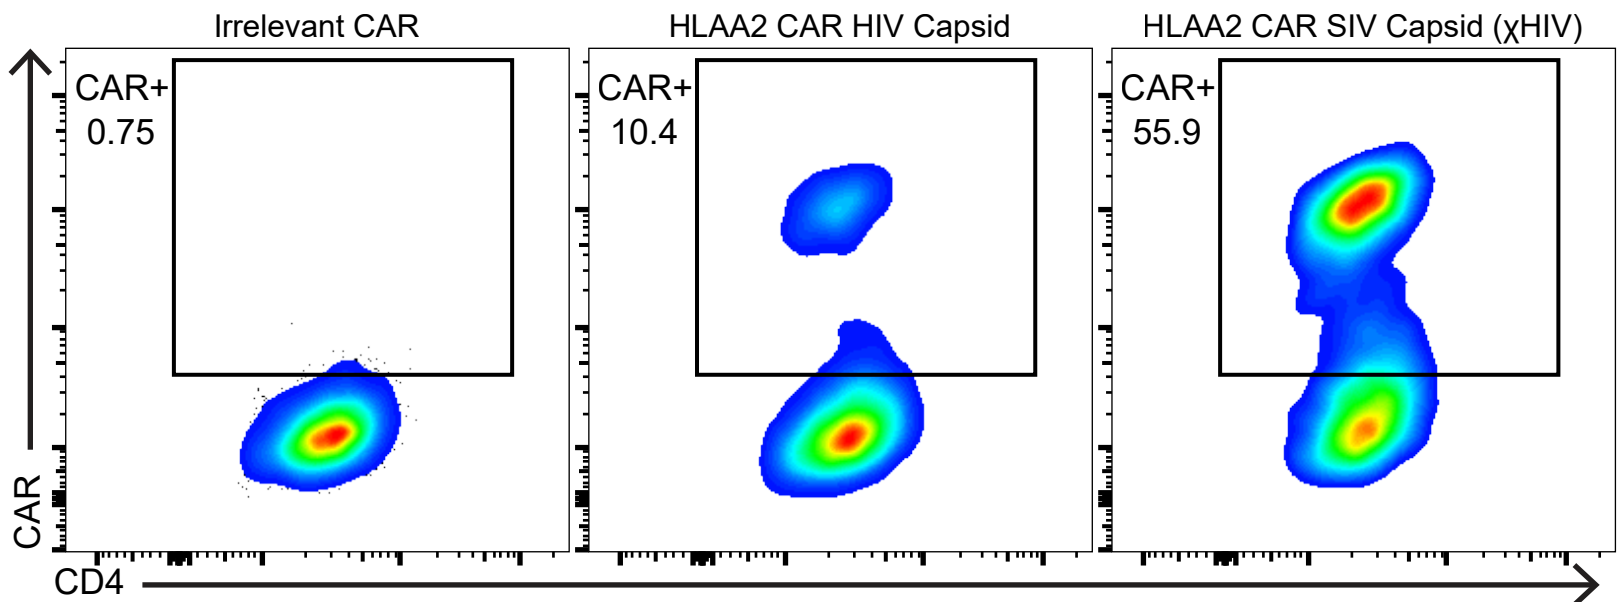

**Figure S2. Lentiviral transduction with SIV capsid ( $\chi$ HIV) virus outperforms HIV capsid virus, related to Figure 2.** *Cynomolgus macaque* T cells were transduced with HLAA2 CAR lentivirus containing HIV or SIV capsid and stained for CAR expression with HLA-A2 tetramer.

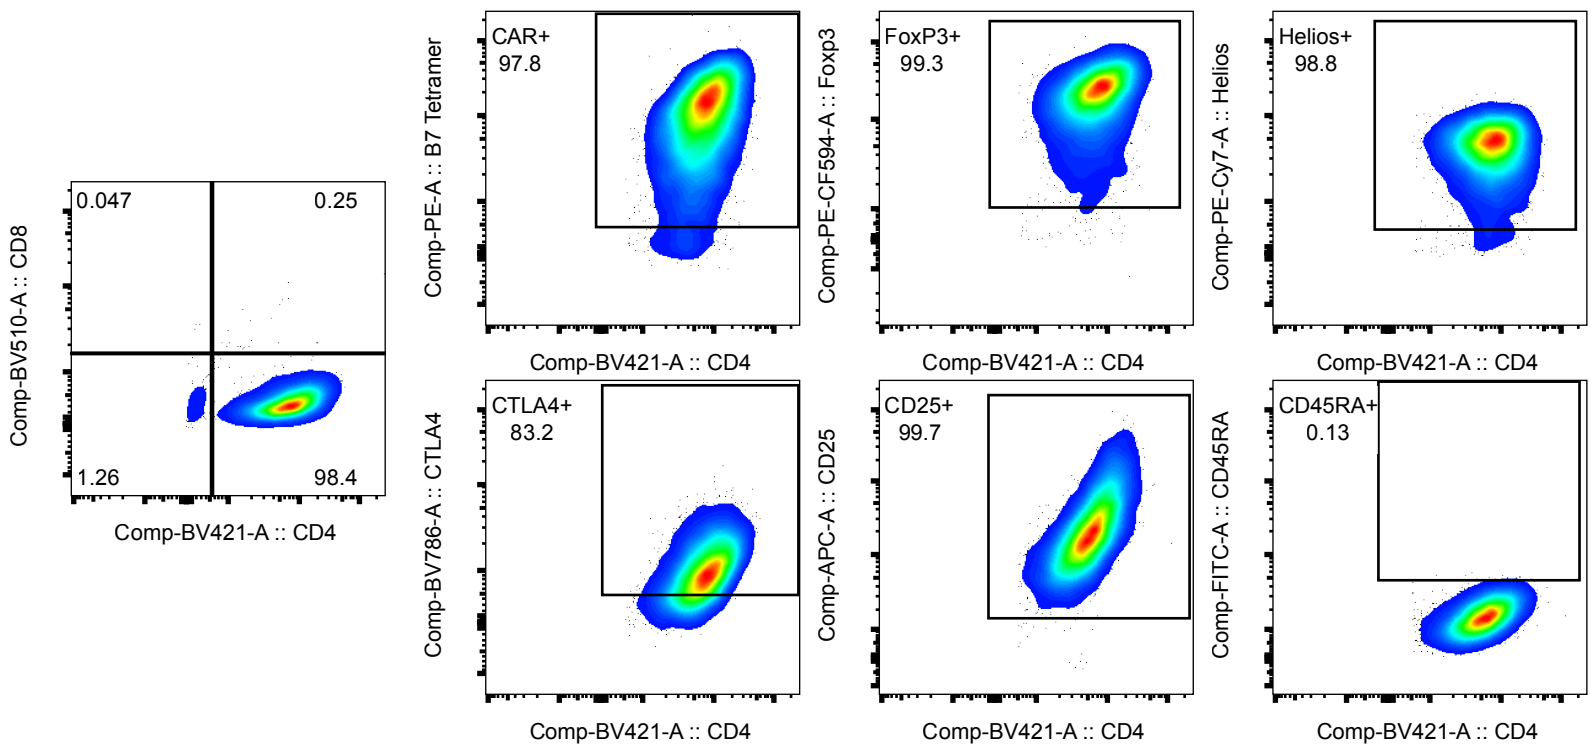

**Figure S3. Expanded CAR Treg products express FoxP3, Helios, CTLA-4, and CD25, but lose CD45RA expression, Related to Figure 2.** Flow cytometry phenotype of CAR Treg product following expansion. Data are representative of 8 similarly stained CAR Treg products.

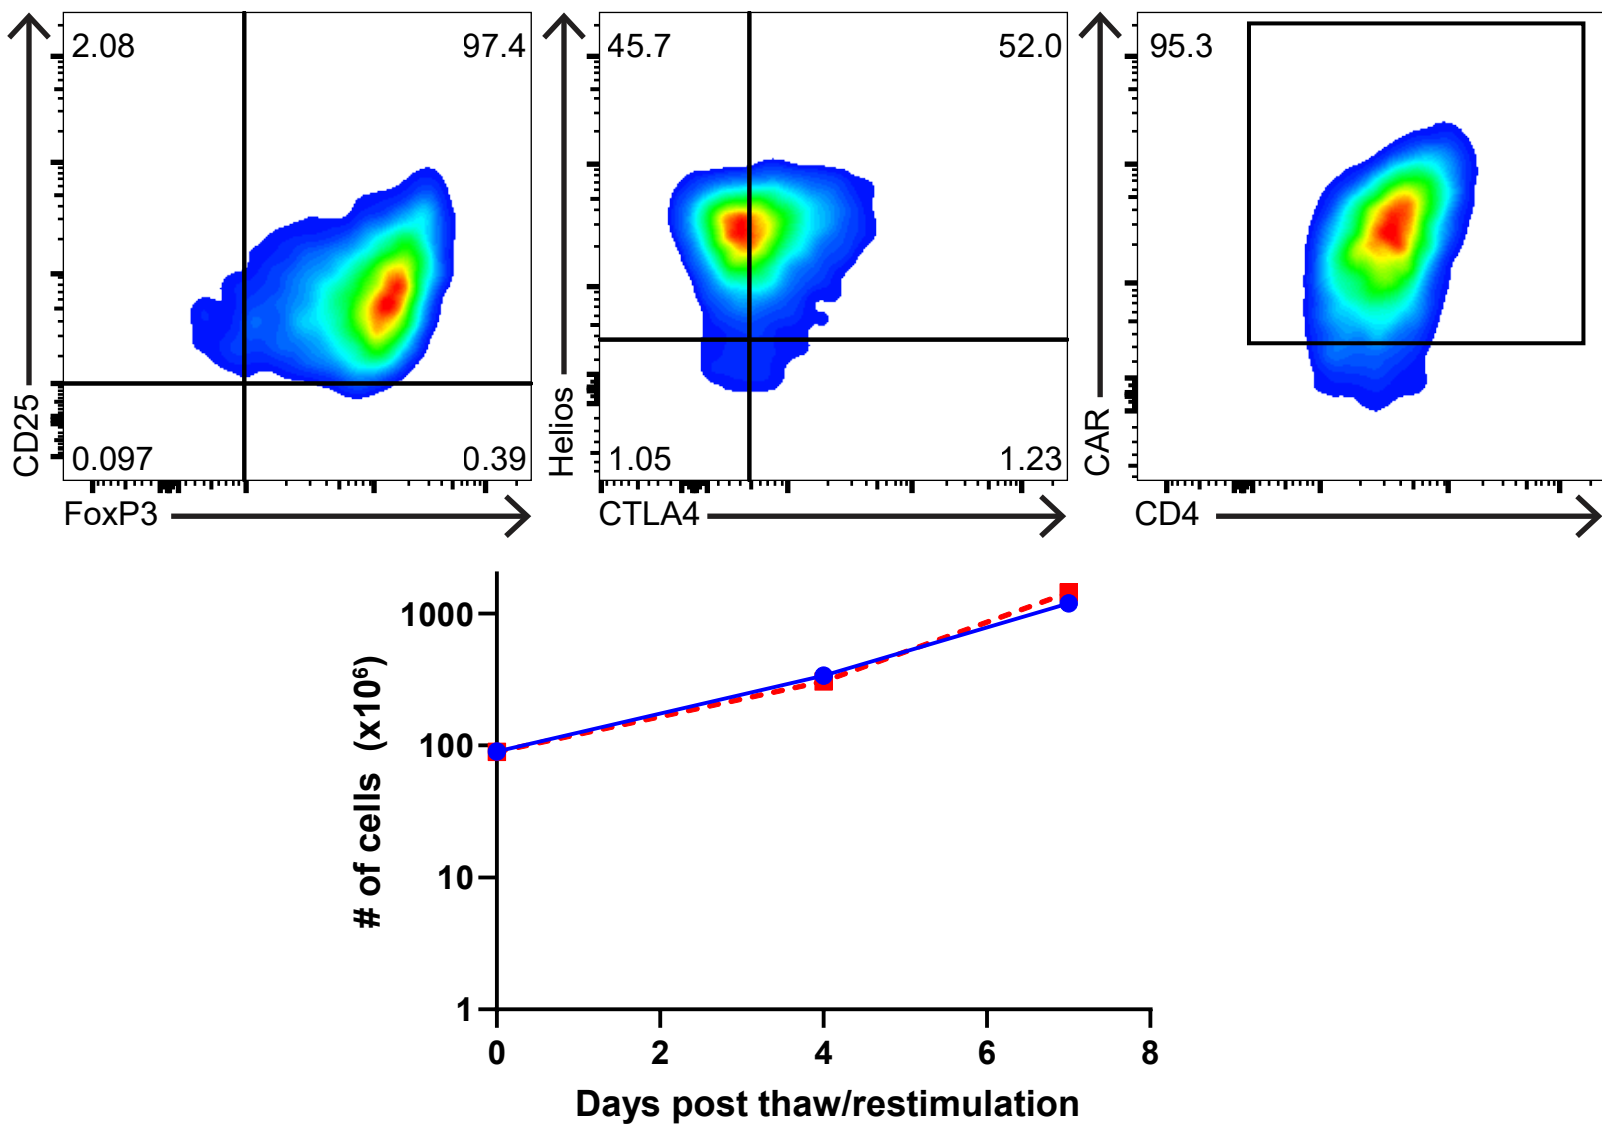

**Figure S4. CAR Treg products survive cryopreservation and can be further expanded, Related to Figure 2.** Flow cytometry phenotype (top) and expansion kinetics (bottom) 7 days following thawing and restimulation of cryopreserved CAR Treg product. Each line represents 1 of 2 separate expanded products. Gates are based on FMO controls.

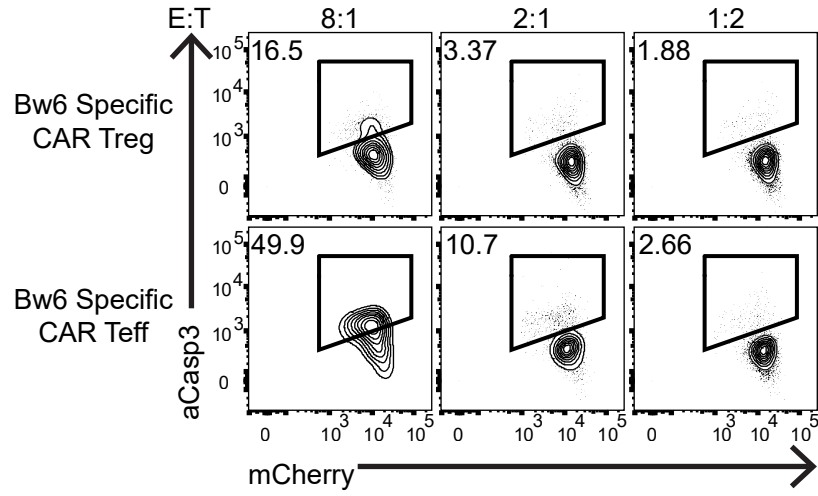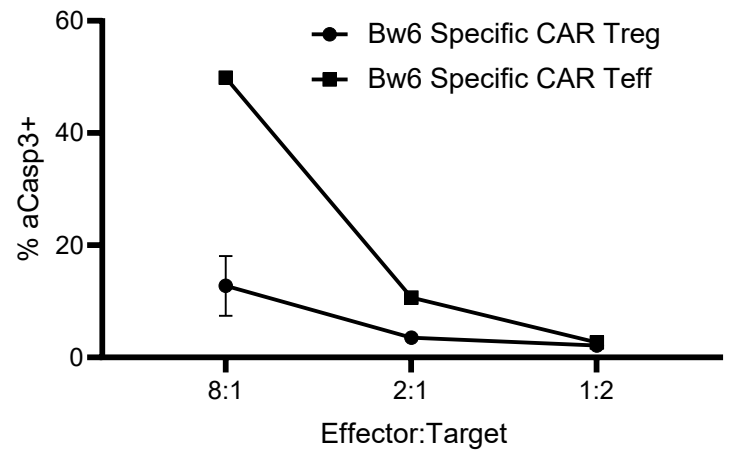

**Figure S5. Bw6 specific CAR Tregs induce minimal active caspase 3 on target cells, Related to Figure 4.** Bw6 specific CAR Tregs or CAR Teffs were mixed at the indicated effector to target ratio (E:T) with Bw6+ target aAPCs overnight before intracellular staining with active caspase-3 antibody. Target cells were transduced with mCherry to differentiate them from CAR T cells.

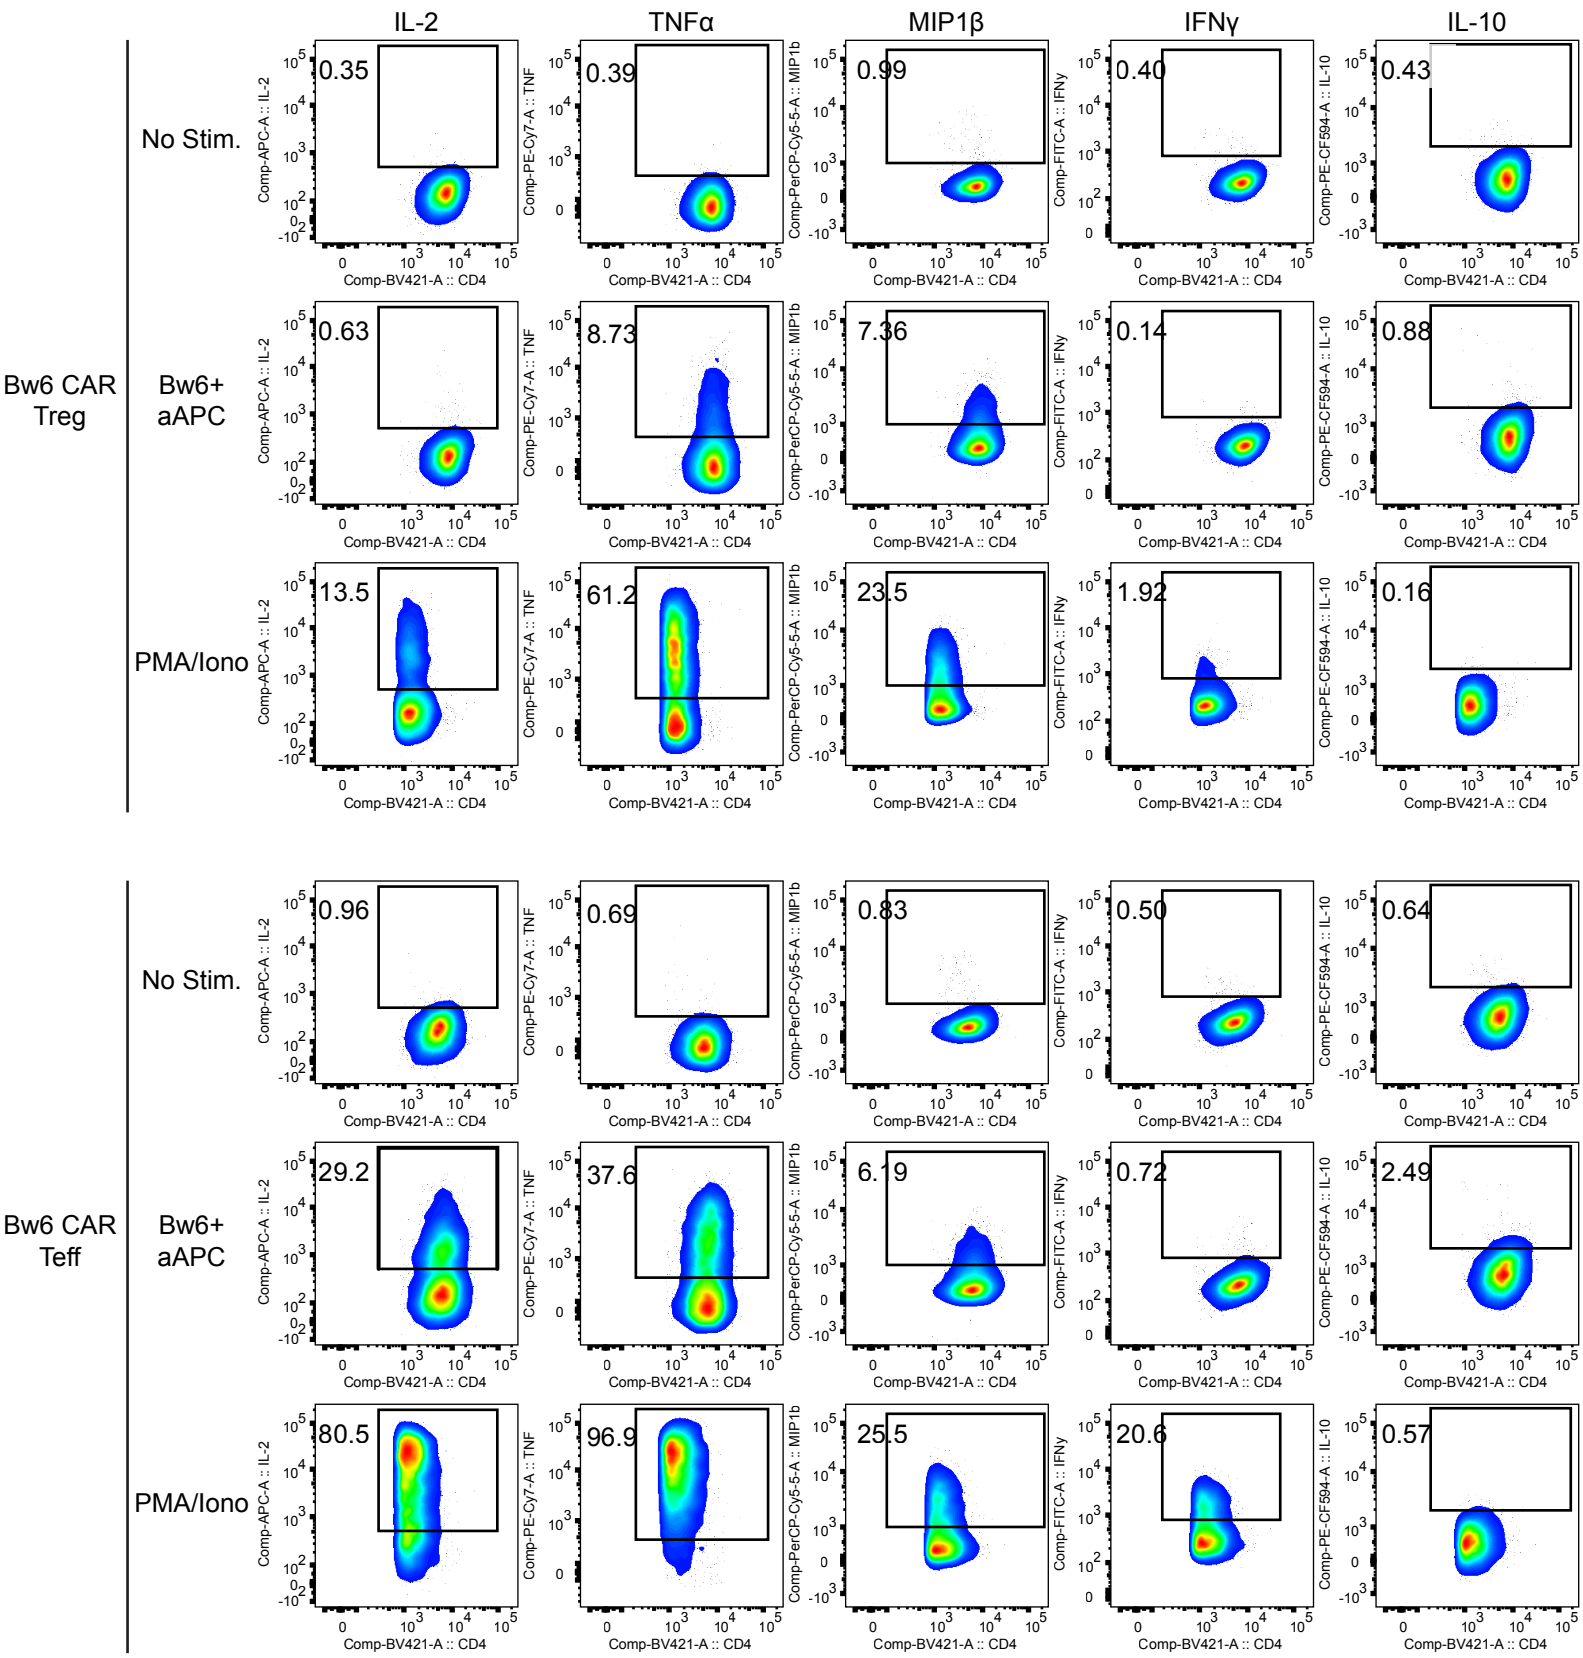

**Figure S6. CAR Treg products secrete some TNF $\alpha$  and MIP1 $\beta$ , but no IL-2, IFN $\gamma$ , or IL-10, Related to Figure 4.** Flow plots displaying cytokine secretion following 5 hour co-culture between indicated cell types and Bw6+ aAPCs or PMA/ionomycin. Data are representative of 4 independent experiments.
